# Supplementary material for: Integration of marker-free selection of single cells at a wireless electrode array with parallel fluidic isolation and electrical lysis
Source: Royal Society of Chemistry journal article supplement (doi:10.1039/c8sc04804e), 2018-11-26
Supplement: c8sc04804e1.pdf [file c8sc04804e1.pdf]

## Supporting Information

### **Integration of Marker-Free Selection of Single Cells at a Wireless Electrode Array with Parallel Fluidic Isolation and Electrical Lysis**

Min Li, Robbyn K. Anand\*

Department of Chemistry, Iowa State University, Ames, Iowa 50011, United States

## Supporting Information

### **This PDF file includes:**

#### Materials and Methods

1. Chemicals
2. Cell Culture
3. DEP Experiments
4. Device Dimensions
5. Fluid Exchange
6. Cell Re-capture
7. Electrical Lysis
8. Fluid Isolation

Figs. S1 to S10

References

## Materials and Methods

**1. Chemicals.** The silicone elastomer and curing agent (Sylgard 184), bovine serum albumin (BSA) (biotech grade), 0.25% Trypsin-EDTA (1X), Green dye (BODIPY™ disulfonate) and red dye (Dextran, Texas Red™, 70 kDa) were purchased from Fisher Scientific (Thermo Fisher Scientific, Inc., Waltham, MA). The DMEM/F12 cell culture medium, dextrose, sucrose, Pluronic® F-108, 1.0 M Tris·HCl stock and the ionic liquid 1-Decyl-3-methylimidazolium bis(trifluoromethanesulfonyl)imide were obtained from Sigma-Aldrich, Inc. (St. Louis, MO). All dilutions were conducted with Type 1 water (18.2 MΩ·cm). DEP buffer was comprised of 8.0% sucrose, 0.3% dextrose, and 0.1% BSA in 1.0 mM Tris buffer (pH 8.1).

**2. Cell Culture.** MDA-MB-231 cells were obtained from ATCC and cultured in DMEM/F12 with 1% pen-strep and 10% fetal bovine serum supplementation at 37 °C and 5% CO<sub>2</sub>. All cells were subcultured every 2 days to maintain a cell confluence less than 80%. In preparation of DEP experiments, MDA-MB-231 cells were detached from culture flask using 0.25% Trypsin-EDTA (1X), followed by pelleting by centrifugation and resuspension in 7.0 mL DEP buffer. Pelleting and resuspension to cell concentration of 5x10<sup>3</sup> cells/mL was repeated one additional time to wash cells in DEP buffer before DEP experiments.

**3. DEP Experiments.** All the devices were designed to operate such that the MDA-MB-231 cell solutions were flowed through the main channel, from which they were attracted to and captured at BPE tips (positive DEP, pDEP). Prior to DEP experiments, all devices were treated with DEP buffer containing 3.0 μM Pluronic solution overnight, followed by rinsing with DEP buffer for 15 min. Device operation was accomplished by the application of an AC voltage at coplanar driving electrodes at each side of the BPE arrays using a Tektronix AFG3011C waveform generator (Tektronix, Beaverton, OR) and Trek model 2205 amplifier (Trek, Lockport, NY). The AC frequency was maintained at 70 kHz at which MDA-MB-231 cells experience strong pDEP. A Nikon Eclipse Ti inverted microscope and Nikon AZ-100 microscope (Nikon, Tokyo, Japan) were utilized to image cells to obtain fluorescence and bright field images, respectively.

For experiments that were used to optimize flow rates and applied voltages, a Pluronic-treated device was rinsed with DEP buffer for 15 min. The solution in the inlet reservoir (4.0 mm diameter) was then placed with solution, and a height differential was established between the inlet and outlet reservoirs to achieve a desired average linear flow velocity in the channels. Subsequently, an AC signal was applied at the driving electrodes to generate the desired average electric field strength for cell capture and re-capture. For experiments with fluid exchange and isolation steps, 20.0 μL of DEP buffer solution was pipetted into a 1.0 mm-diameter inlet reservoir and injected into the microchannels by using negative pressure (withdrawal from the outlet with a syringe pump (Pico Pump Elite Dual Syringe Pump, Harvard Apparatus, Holliston, MA)). The flow was then set such that the average linear velocity was 120 μm/s for cell capture, transfer and re-capture steps. Subsequently, the flow was adjusted to 0.1 μm/min for fluid exchange and isolation.

**4. Device Dimensions.** The dimensions for designs evaluated in the present work are described here. All designs were modified, as follows, from the parallel-channel design that was reported previously.<sup>[1]</sup> All channels, pockets and chambers are 25 μm tall. A reaction chamber (200 μm wide x 400 μm long) was extended from each micropocket (20 μm wide x 25 μm long) (Figure S1). A leak channel (0.3165 mm long) and one of several widths as described in the Results and Discussion) was affixed at a 60 °C angle to each chamber to make a fluidic connection to the main channel. For a proof-of-concept demonstration, we simplified the design from our previous 32 channels into two parallel channels. As shown in Figure S2, the resultant parallel microchannels were each 6.8 mm long × 100 μm wide × 25 μm tall and separated by 1.05 mm (center-to-center). Each side of each parallel channel featured 12 cell-assay units (micropocket,

reaction chamber and leak channel), leading to 48 units in total. The electrodes extended into the pockets from under the PDMS to a distance of 5.0  $\mu\text{m}$  from the channel. The two rows of electrodes at the ends (outermost channels) were interconnected and led to contacts for the waveform generator.

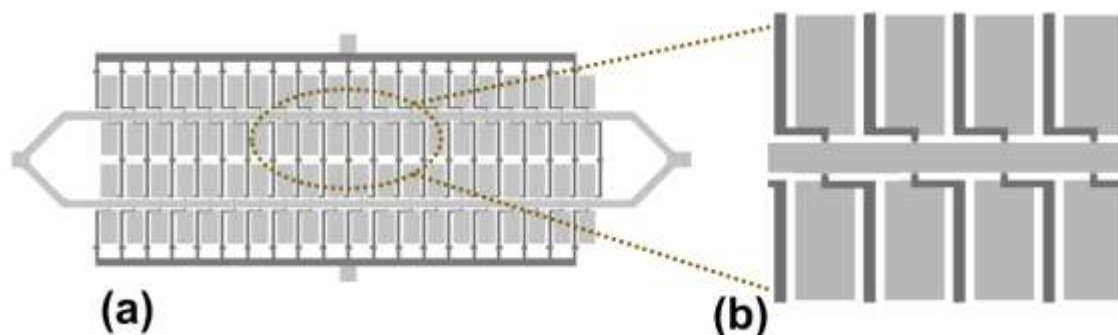

**Figure S1.** The AutoCAD drawing of the parallel-channel when no leak channel is present. (a) zoom-out image; (b) zoom-in image. The microchannels are in light grey and the electrodes are in dark grey.

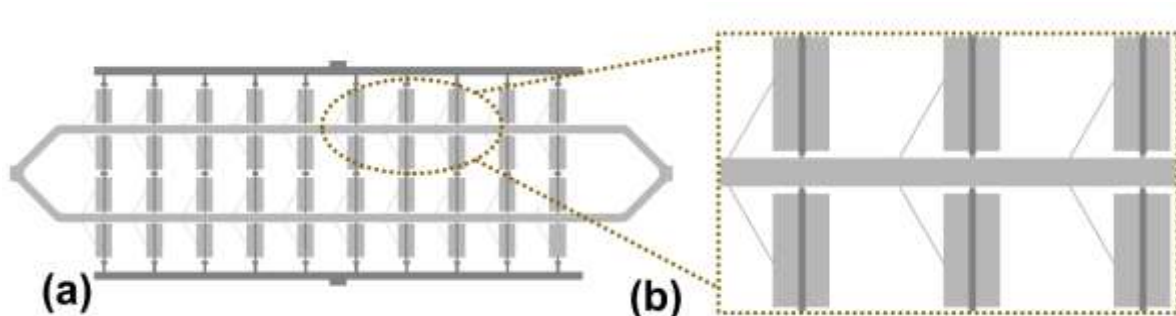

**Figure S2.** The AutoCAD drawing of the parallel-channel device with leak channel added. (a) zoomed-out image; (b) zoom-in image. The microchannels are in light grey and the electrodes are in dark grey. Split BPE design was conducted by dividing each single BPE from the middle into two separate BPEs. The tip-to-tip distance is 0  $\mu\text{m}$  in AutoCAD drawing. After etching, the distance between split BPE tips is about 10  $\mu\text{m}$ .

**5. Fluid exchange.** Figure S3 shows the result obtained for the exchange of two solutions of fluorescent dye in DEP buffer in the absence of leak channel. This data was compared with the results obtained with the leak channel that are described in the main text (Figure 4).

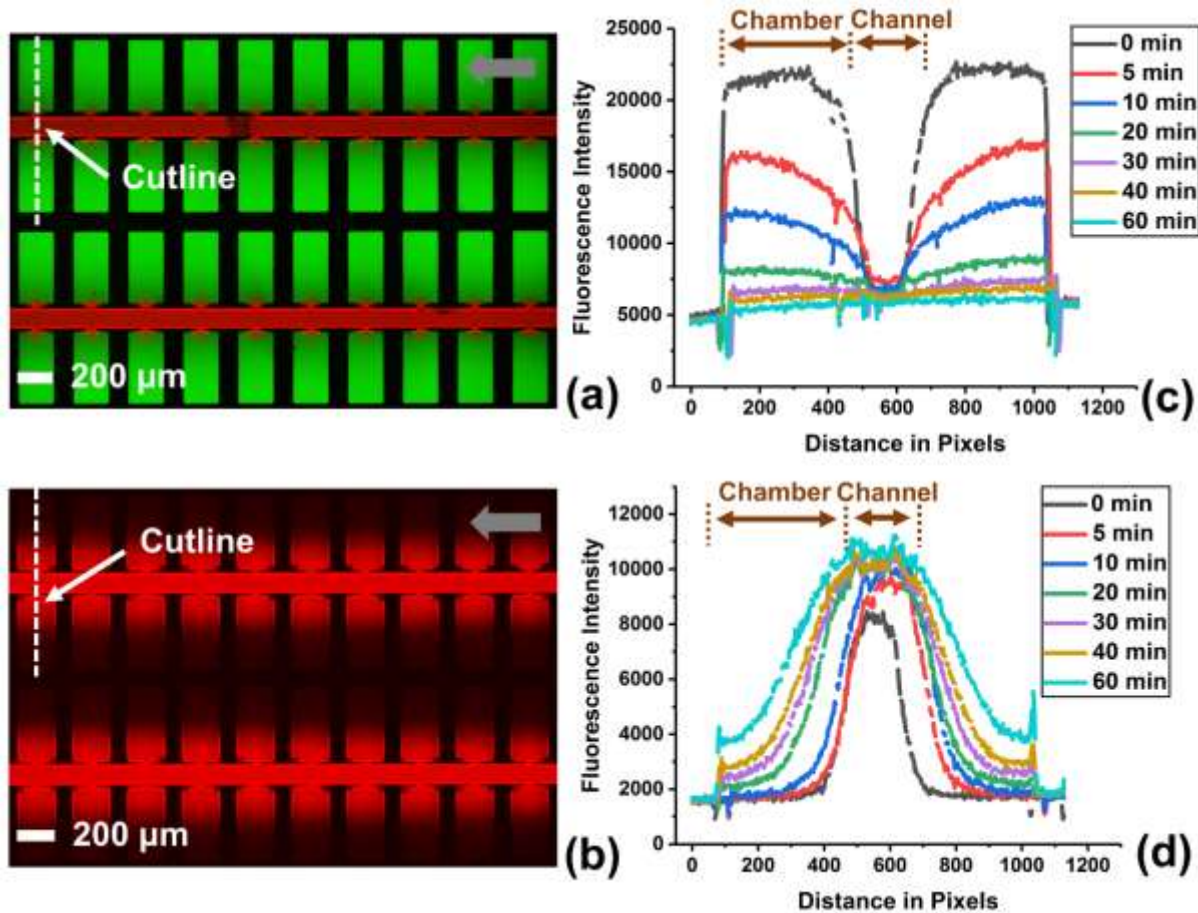

**Figure S3.** Fluorescence micrographs of the device without leak channel. The device filled with a green dye after 5 min (a), and (b) 30 min after replacement of the fluid in the channels with red dye. Time-lapse profile of fluorescence intensity for green dye (c) and red dye (d) along the cutline. To obtain such results, 10  $\mu\text{L}$  of green dye solution was first pipetted in the 2.0 mm-diameter reservoir and injected into the microchannels by using negative pressure. The flow was then set to 0.1  $\mu\text{L}/\text{min}$  and maintained for 30 min. Subsequently, the green dye solution in the reservoir was pipetted out and replaced with 10  $\mu\text{L}$  of red dye. Grey arrows indicate flow direction.

**6. Cell re-capture.** The addition of a leak channel induces a flow pathway from the main channel into micropocket and out of the leak channel. Thus, two flow pathways are present and cells experience an additional drag force ( $F_{\text{Drag-y}}$ ) created by leak flow along the  $y$ -direction. Consequently, when an electric field is applied, cells of interest can be selectively captured at the micropockets; and then, after turning off the AC voltage, captured single cells move along the leak flow circuit, and are transferred into chambers. To achieve the desired capture and transfer of individual cells, several parameters need to be considered: (i) *Pocket size.* Micropockets enable volumetric control of the number of cells captured and protect cells from being washed away by fluid flow. To perform single-cell capture, cell-scale pockets are required. (ii) *Leak channel width.* A large leak channel cross section leads to fast flow (strong  $F_{\text{Drag}}$ ), which pushes cells into chambers even when the AC capture voltage is on and results in capture of multiple cells. Furthermore, under this condition, cells randomly circuit in and out of chambers. On the other hand, if the leak channel width is too narrow, extremely fast flow is needed for cell transfer, and inconveniently, two distinct flow rates would be required for the capture step (slow flow) and transfer step (fast flow). Thus, the leak channel width needs to lie between these extremes. (iii) *BPE location.* Since the position of cell capture determines the relative strength of drag forces derived by the two flow pathways (along main channel and along leak

channel), and thereby the direction of cell movement, the location of the BPE tip must be carefully controlled. When cells are captured within main channel streamlines, cells are readily knocked away by fluid flow. However, when BPE tips are far away from main channels, cell transfer becomes very favorable but may lead to attachment of a second cell.

Using the optimal design (20 x 25  $\mu\text{m}$  pocket, 7  $\mu\text{m}$  wide leak channel and BPE tip positioned 5-15  $\mu\text{m}$  inside the pocket), high-fidelity capture and transfer of individual cells were achieved. During cell transport into microchambers, the flow pathway for cells with large and small diameters were investigated (Figure S4). First, transferred cells transferred only experienced drag force (proportional to cell radii,  $F_{\text{Drag}} \propto r$ ), leading to fast movement for large cells. When cells moved further ( $\sim 60\text{-}90 \mu\text{m}$  from the to main channel), the AC voltage was turned back on and DEP force ( $F_{\text{DEP}}$ ) directed cells to move towards the split between BPE tips, while  $F_{\text{Drag}}$  pushed cells towards the leak channel. Since DEP force is more sensitive to cell diameter ( $F_{\text{DEP}} \propto r^3$ ), the flow pathway for small cells deviated more towards leak channel than that of for large cells. To prevent cells from being dragged away, the AC voltage was increased from 22  $V_{\text{pp}}$  to 32  $V_{\text{pp}}$  for cell re-capture. Under such increased electric field, 100% of cells transferred were attracted and captured at split BPEs.

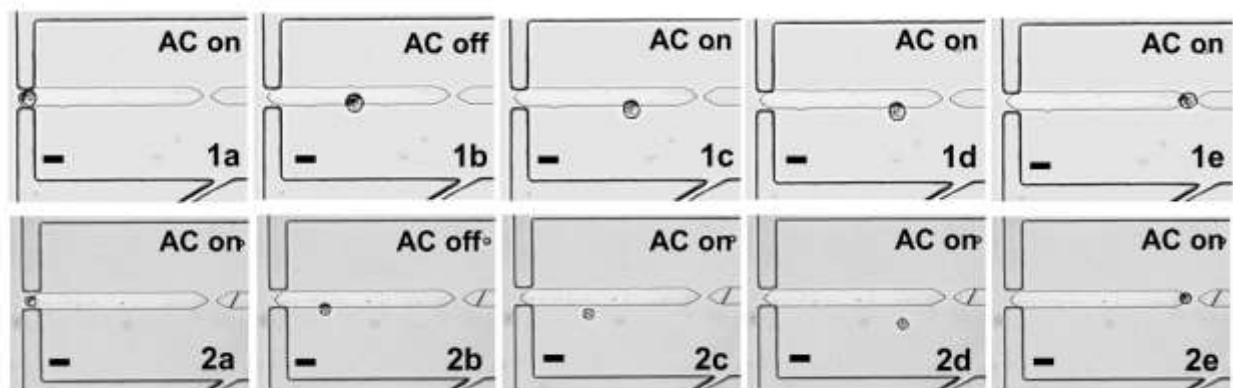

**Figure S4.** Time-lapse images of cell re-capture under the optimal conditions (linear average velocity, 120  $\mu\text{m}/\text{s}$ ; applied voltage, 22  $V_{\text{pp}}$  for capture and 32  $V_{\text{pp}}$  for re-capture). (1a-1e) Cells with large diameter moved along BPE and were re-captured at BPE tips. (2a-2e) The flow pathway of small cells deviated slightly towards leak channel (due to weak DEP force), and these smaller cells were retained mainly at one BPE tip. Scale bar: 25  $\mu\text{m}$ .

**7. Electrical lysis.** For assays including genomics and proteomics, of particular importance is lysis of cells to release intracellular contents. Considering the potential alteration of a target molecule's native structure and expression during lysis, the lysis approach must be both gentle and rapid. Traditional mechanical lysis such as bead beating is effective on the macroscale but not compatible with a microfluidic device. Although sharp nanostructures have been reported for cell lysis in microchannels,<sup>[2]</sup> inclusion of such structures greatly complicates device fabrication. Sonication typically takes about 50 s for single cell lysis and the heat generated may denature proteins. Chemical lysis, often with detergents, is a potentially milder and quicker protocol, while it requires precise liquid handling (an extra fluid exchange step) and careful selection of optimal lysis media. Electrical lysis, achieved by placing cells under sufficiently high electric field for electroporation, is simple, fast (on the order of milliseconds) and efficient.<sup>[3]</sup> To avoid the formation of gas bubbles under a high electric field, AC electric field is often employed.

The split BPE design in the present work enables electrical lysis of captured individual cells without modification of channels or addition of further electrical leads. After cells were re-captured at the split BPEs, electrical lysis was performed by simply increasing the applied voltage. Figure S5 shows the bright-

field images of cells taken before and after the voltage was increased from 32 V<sub>pp</sub> to a higher voltage in the range of 112 V<sub>pp</sub> to 166 V<sub>pp</sub> (as indicated in the caption) and held for 5 s. The lowest voltage for which lysis of 100% of captured cells was observed was 166 V<sub>pp</sub>. Figure S6 shows the successful lysis of ten different cells when the applied voltage was directly increased from 32 V<sub>pp</sub> to 166 V<sub>pp</sub> and maintained for 5s.

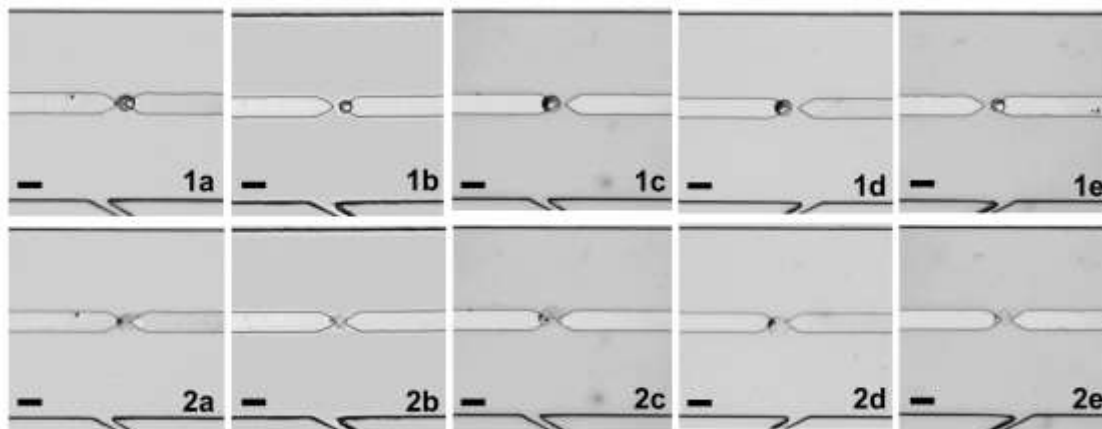

**Figure S5.** Investigation of voltage needed for electric lysis. (1a-1e) cells were re-captured at split BPEs at 32 V<sub>pp</sub>. (2a-2e) The applied voltage was gradually increased to 112 V<sub>pp</sub> (2a), 126 V<sub>pp</sub> (2b), 140 V<sub>pp</sub> (2c), 152 V<sub>pp</sub> (2d), and 166 V<sub>pp</sub> (2e) until electroporation was observed. Prior to cell lysis, the fluid flow in the main channels was stopped to observe the static lysis. Scale bar: 25 μm.

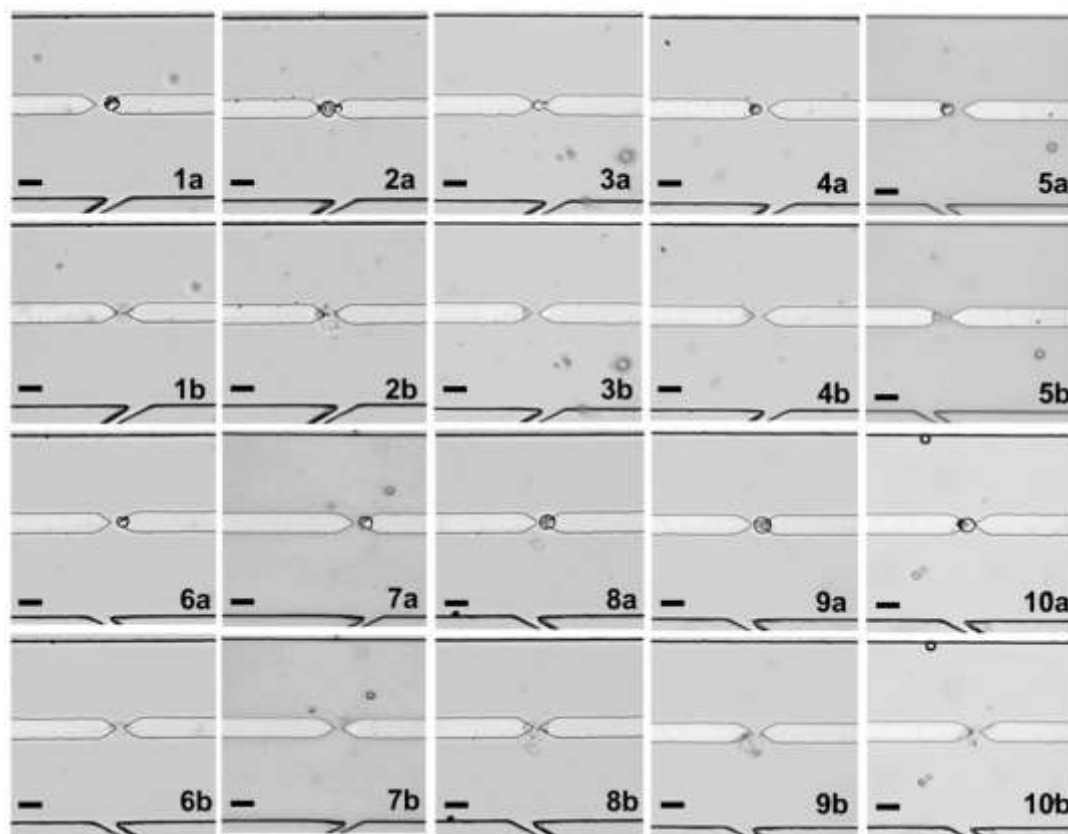

**Figure S6.** Brightfield images of cell lysis when directly increased the applied voltage from 32 V<sub>pp</sub> (1a-10a) to 166 V<sub>pp</sub> (1b-10b). 100% of cells were lysed under such electric field strength. Scale bar: 25 μm.

**8. Fluidic isolation.** Fluidic isolation of individual reaction chambers by an immiscible phase is crucial to circumvent cross-contamination and provide accurate readout for cell analysis, and additionally, this immiscible phase needs to be conductive to allow electrical lysis after fluid sealing. In this scenario, we selected ionic liquid (IL) to address such requirements and investigated conditions for maintaining the phase boundary. To minimize the consumption of IL, fluidic flow of IL was stopped after entering the main channels. Figure S7 shows the results of such approach under various initial flow rates. It was found that IL slowly expanded into reaction chambers after flow was stopped. However, the position of the boundary was maintained at the chamber opening at early times (< 5 min) for flow rates of 1.0  $\mu\text{L}/\text{min}$  and 0.5  $\mu\text{L}/\text{min}$ , indicating that continuous flow lower than 1.0  $\mu\text{L}/\text{min}$  may result in a stable boundary. Thus, fluidic isolation by continuous flow at rates lower than 1.0  $\mu\text{L}/\text{min}$  was subsequently evaluated.

Reducing flow rate to 0.1  $\mu\text{L}/\text{min}$  resulted in a stable phase boundary for at least 1 h (Figure S8), and the formation of the boundary was uniform across the entire chip (Figure S9). Using this optimized flow condition, the entire work flow was conducted (Figure S10). It is worth mentioning that fluid exchange needs to occur twice for on-chip analysis: exchange of cell solution with DEP buffer to wash away excess cells after capture and before cell transfer (Figure S10b); and exchange of DEP buffer with reagents for subsequent cellular analysis (Figure S4). The leak channel not only facilitates cell transfer by inducing additional drag force, but also enables rapid fluid exchange in both of these instances.

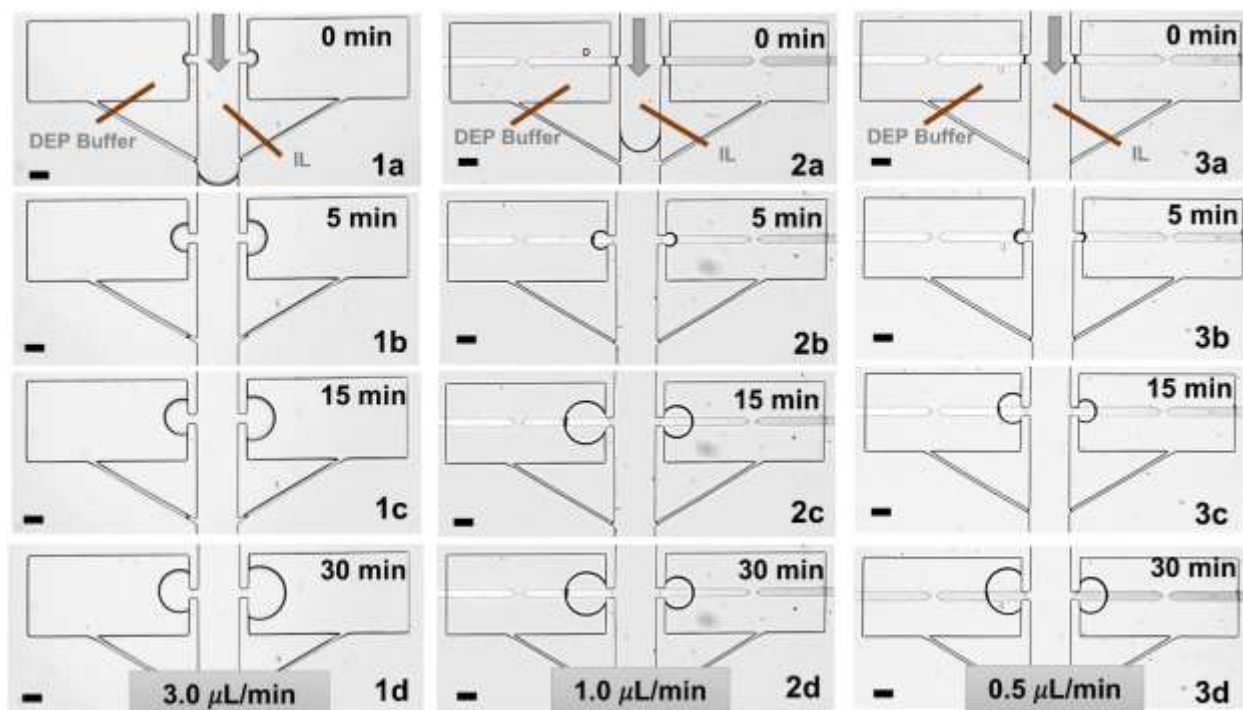

**Figure S7.** Performance of fluid isolation when initial flow rate was 3.0  $\mu\text{L}/\text{min}$  (1a-1d), 1.0  $\mu\text{L}/\text{min}$  (2a-2d), and 0.5  $\mu\text{L}/\text{min}$  (3a-3d), respectively. To obtain such results, 20  $\mu\text{L}$  of DEP buffer solution was first pipetted into the 1.0 mm-diameter reservoir and injected into the microchannels by using negative pressure. The flow was then set to 3.0, 1.0, or 0.5  $\mu\text{L}/\text{min}$  and maintained for 30 min, followed by replacement of DEP buffer with 10  $\mu\text{L}$  ionic liquid on the reservoir. When ionic liquid entered the main channel, the syringe pump was shut off to stop the flow. Scale bar: 50  $\mu\text{m}$ . The grey arrows indicate flow direction.



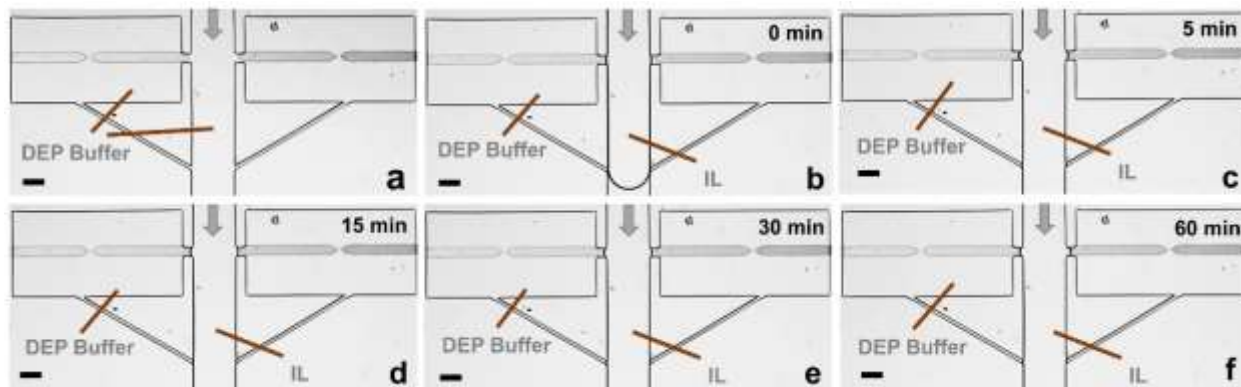

**Figure S8.** Results of fluid isolation at a flow rate of  $0.1 \mu\text{L}/\text{min}$ . Scale bar:  $50 \mu\text{m}$ . The grey arrows indicate the flow direction.

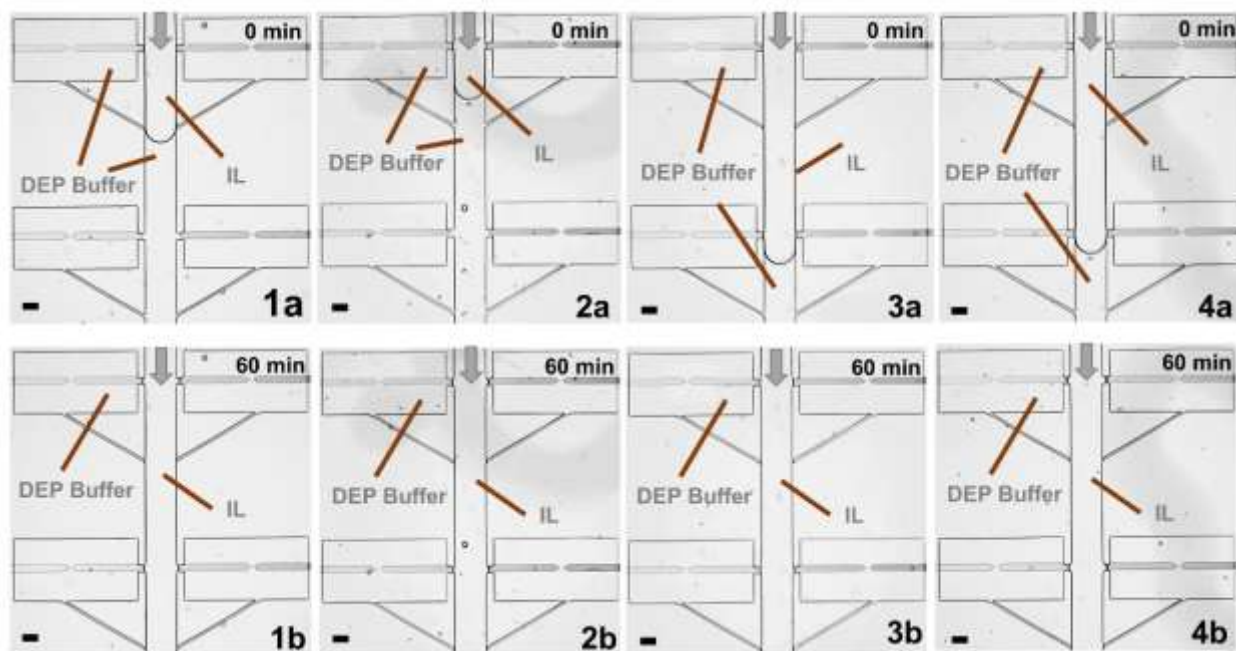

**Figure S9.** Results of fluid isolation at a flow rate of  $0.1 \mu\text{L}/\text{min}$ . Chambers were selected randomly to prove the uniform formation of the stable phase boundary throughout the entire chip. Scale bar:  $50 \mu\text{m}$ . The grey arrows indicate the flow direction.

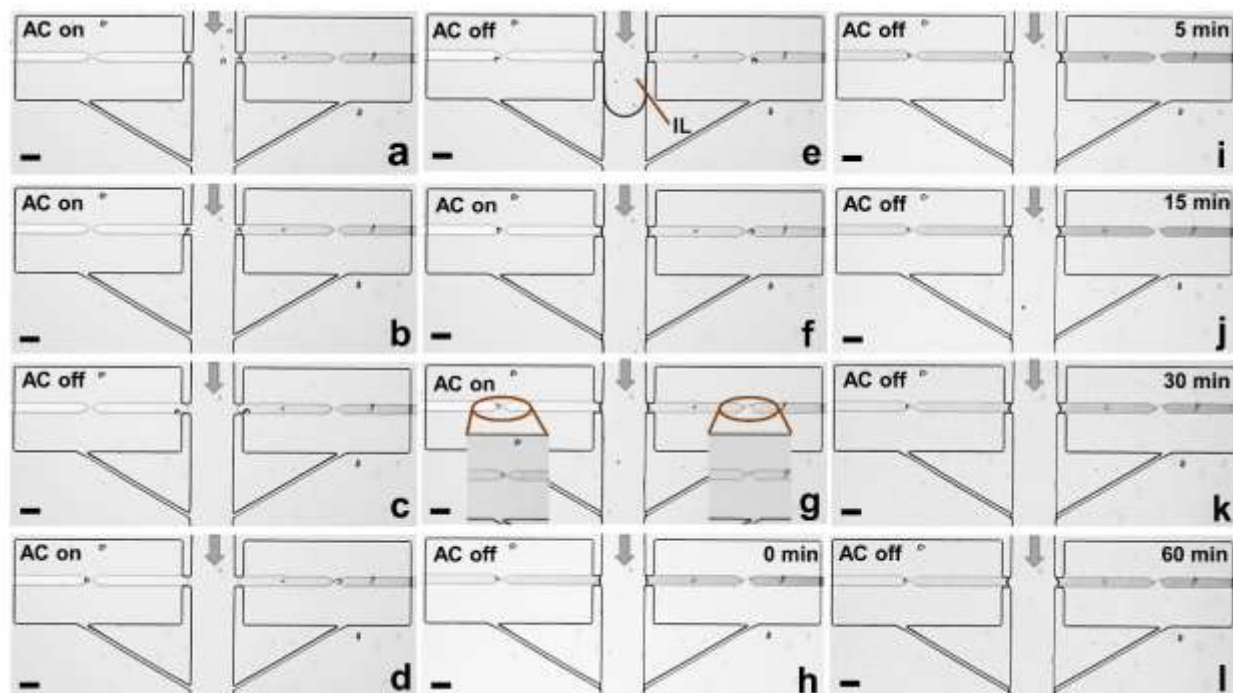

**Figure S10.** Bright-field images of the entire workflow, which includes cell capture (a), fluid exchange (b), cell transfer (c), cell re-capture (d), fluidic isolation (e-f), and electrical lysis (g). After electrical lysis, the flow of IL was maintained for 1 h to further demonstrate the stability of the boundary. The fluid exchange shown in (b) is required to wash away excess cells to ensure no further cells are captured during subsequent cell transfer. For on-chip analysis, fluid exchange after (d) needs to be added to replace buffer solution with reaction reagents. Scale bar: 50  $\mu\text{m}$ . The grey arrows indicate flow direction.

### References:

- [1] M. Li, R. K. Anand, *J. Am. Chem. Soc.* **2017**, *139*, 8950-8959.
- [2] D. Di Carlo, K. H. Jeong, L. P. Lee, *Lab Chip* **2003**, *3*, 287-291.
- [3] S. Hoscic, S. K. Murthy, A. N. Koppes, *Anal. Chem.* **2016**, *88*, 354-380.
